# Supplementary material
Source: Springer Nature journal article supplement (https://www.springermedizin.de/resource/supplementary/13063_2010_598_MOESM2_ESM.pdf/9618834)
Supplement: MOESM2 [file 9618834]

Males or females, 30 to 70 years-old, prehypertension (office blood pressure); no antihypertensive treatment, without allergy to chlortalidone and amiloride, and no previous CHD, severe chronic disease, or pregnant women

Lifestyle  
modification

Prehypertension

Chlortalidone  
and Amiloride

R

Placebo

3 m

6 m

9 m

12 m

15 m

Hypertension  
Adverse effects  
Target-organ damage

3 m

6 m

9 m

12 m

15 m

Hypertension  
Adverse effects  
Target-organ damage
